# Supplementary material for: Exploration of spatial biases in natural hardwood regeneration in conifer plantations in southwestern Japan
Source: Research Square preprint supplement (doi:10.21203/rs.3.rs-7644359/v1), 2026-01-20
Supplement: Supplementary file 1 [file dc87949ec8f930e664337f84.docx]

Supporting Information Table

Table S1. Geological zones classified by rock formation ages and processes, occurrences, and hardwood percentages (top) and elevation zones (bottom). The five most common geologic classifications were used in hardwood regeneration analyses. Accretionary complexes comprise various substrates, including basalt, chert, sandstone, mudstone, and limestone. Additional details are provided elsewhere (Geological Survey of Japan, AIST, 2023).

| Geological category | | % of target area | Top five geologic categories | No. of cells | | | % of hardwood–cells |
| --- | --- | --- | --- | --- | --- | --- | --- |
| Belt/terrane | Age/lithology | Conifer-cells | Hardwood-cells | Total |
|
| Sambagawa Belt | Mesozoic/  metamorphic rock | 16% | Yes | 317,068 | 69,674 | 386,742 | 18.0% |
| Chichibu Belt | Permian/  accretionary complex | 7% | Yes | 119,766 | 35,835 | 155,601 | 23.0% |
| Chichibu Belt | Jurassic/  accretionary complex | 33% | Yes | 620,838 | 173,719 | 794,557 | 21.9% |
| Shimanto Belt | Cretaceous/  accretionary complex | 24% | Yes | 443,361 | 130,205 | 573,566 | 22.7% |
| Cretaceous of Chichibu Terrane | Cretaceous/  marine sedimentary rocks | 17% | Yes | 300,684 | 113,253 | 413,937 | 27.4% |
| Other | Jurassic/  marine sedimentary rocks | 1.4% | No | 27,236 | 6364 | 33,600 | 18.9% |
| Other | Paleozoic, Igneous/  rocks | 0.3% | No | 6373 | 1522 | 7895 | 19.3% |
| Other | Quaternary/  sedimentary rocks | 0.3% | No | 4388 | 2827 | 7215 | 39.2% |
| Total |  |  |  | 1,839,714 | 533,399 | 2,373,113 | 22.5% |

| Geological category | | No. of cells | | | % of hardwood–cells | | |
| --- | --- | --- | --- | --- | --- | --- | --- |
| Belt/terrane | Age/lithology | < 600 m | 600–900 m | > 900 m | < 600 m | 600–900 m | > 900 m |
| Sambagawa Belt | Mesozoic/  metamorphic rock | 112,600 | 169,867 | 104,275 | 10.3% | 19.1% | 24.6% |
| Chichibu Belt | Permian/  accretionary complex | 127,677 | 25,842 | 2082 | 24.5% | 16.0% | 23.2% |
| Chichibu Belt | Jurassic/  accretionary complex | 355,516 | 309,161 | 129,880 | 20.6% | 21.9% | 25.3% |
| Shimanto Belt | Cretaceous/  accretionary complex | 384,169 | 171,147 | 18,250 | 23.5% | 21.7% | 14.4% |
| Cretaceous of Chichibu Terrane | Cretaceous/  marine sedimentary rocks | 330,510 | 75,444 | 7983 | 27.6% | 26.9% | 22.4% |
| other | Jurassic/  marine sedimentary rocks | 32,415 | 545 | 640 | 18.6% | 46.6% | 12.5% |
| other | Paleozoic, Igneous/  rocks | 7895 | 0 | 0 | 19.3% |  |  |
| other | Quaternary/  sedimentary rocks | 7215 | 0 | 0 | 39.2% |  |  |
| Total |  | 1,357,997 | 752,006 | 263,110 | 22.7% | 21.5% | 24.2% |

Table S2. Occurrence of planted tree species categories in a forest management unit.

Categories other than cedar, cypress, and hardwood provided in the ALS dataset were omitted. Preliminary analyses confirmed mixed planting of cedar and cypress in 55.3% of the 21,865 management units recorded as cedar plantations and 60.7% of the 19,124 units recorded as cypress plantations in the forest register. Among units where mixed planting was not confirmed, 7.6% of those recorded as cedar contained only cypress, and 16% of those recorded as cypress contained only cedar. Forest register data were assumed to represent the majority species in each forest management unit; cedar and cypress were often mixed within a single unit.

| Occurrence categories in the ALS dataset | No. of forest management units (*segyohan*) in each tree species category | |  |
| --- | --- | --- | --- |
| Cedar | Cypress | Total |
| Cedar | 2523 | 1162 | 3685 |
| Cypress | 330 | 1065 | 1395 |
| Hardwood | 1105 | 1009 | 2114 |
| Cedar–cypress | 3256 | 3152 | 6408 |
| Cedar–hardwood | 4490 | 1901 | 6391 |
| Cypress–hardwood | 1324 | 2388 | 3712 |
| Cedar–cypress–hardwood | 8837 | 8447 | 17,284 |
| Total | 21,865 | 19,124 | 40,989 |

Table S3. Tree species classification verification results based on Google Earth imagery.

| (a) Aggregation of cedar and cypress handled separately | | | | | | | |
| --- | --- | --- | --- | --- | --- | --- | --- |
|  |  | Combination pattern | | | | | |
|  |  | No change | | Interchange | | Replaced hardwood | |
| Forest data | | Ce | Cy | Ce | Cy | Ce | Cy |
| ALS data | | Ce | Cy | Cy | Ce | Ha | Ha |
| Visual identification (*n*) | |  |  |  |  |  |  |
| Single | Ce | 29 | 0 | 3 | 23 | 2 | 0 |
|  | Cy | 0 | 37 | 24 | 2 | 0 | 0 |
|  | Ha | 0 | 0 | 1 | 0 | 20 | 13 |
| Dual | Ce–Cy | 15 | 5 | 15 | 17 | 0 | 0 |
|  | Ce–Ha | 5 | 0 | 2 | 5 | 1 | 8 |
|  | Cy–Ha | 0 | 8* | 3 | 2 | 7 | 27 |
| Triple | Ce–Cy–Ha | 1 | 0 | 2 | 1 | 3 | 0 |
| Total |  | 50 | 50 | 50 | 50 | 50 | 50 |
|  |  |  |  |  |  |  |  |
| Percentage of cases (%) | |  |  |  |  |  |  |
| Case 1 | ALS: dominant in grid | 94 | 98 | 86 | 82 | 94 | 100 |
| Case 2 | ALS: appearing in grid | 100 | 100 | 88 | 92 | 96 | 100 |

| (b) Aggregation of cedar and cypress are treated collectively as conifers | | | |
| --- | --- | --- | --- |
|  |  | Combination pattern | |
|  | Forest data | Conifer | Conifer |
|  | ALS data | Conifer | Hardwood |
| Visual identification (*n*) | |  |  |
| Single | Conifer | 170 | 2 |
|  | Hardwood | 1 | 33 |
| Dual | Conifer–hardwood | 29 | 65 |
| Total |  | 200 | 100 |
|  |  |  |  |
| Percentage of cases (%) | |  |  |
| Case 1 | ALS: dominant in grid | 98 | 97 |
| Case 2 | ALS: appearing in grid | 99.5 | 98 |

Ce: *sugi* cedar; Cy: *hinoki* cypress; Ha: hardwood.

Case 1: Tree species in ALS data match the most dominant species in the grid, visually identified in Google Earth imagery. Case 2: Tree species in ALS data appear in the grid, visually identified in Google Earth imagery. *One grid contained a mixture of cypress and bamboo mix.

The accuracy of ALS-based species classification was verified visually through using Google Earth imagery. We extracted 50 grids for each pattern of combinations of tree species categories in the forest registry data and ALS data. The patterns were classified into six specific categories (cedar or cypress in forest registry data × cedar, cypress, or hardwood in ALS data), and two general categories (conifer in forest registry data × conifer, or hardwood in ALS data). The grids were extracted using the “sample” function in R v4.3.3 (R Core Team, 2024). Tree species present within each grid were identified as cedar, cypress, or hardwood and their relative abundance was estimated. A single grid (10 m × 10 m) typically contained four to five canopy trees. The ALS data were obtained in March 2019, and Google Earth imagery was captured during the months of April and May in the year 2021.

The visual identification results are presented in Table S3. Visual identification agreed well with the LiDAR data for all six combination patterns (Table S3a). The tree species in the ALS data was visually identified as the most dominant species (Case 1) in 84–100% of cases, and as appearing within the grid (Case 2) in 88–100% of cases. cases where the tree species in the LiDAR data was the most dominant tree species in the visual identification (Case 1) were 84–100%, and cases where the tree species in the LiDAR data appeared in the visual identification (Case 2) were 88–100%. Agreement between the ALS-based species classification and visual identification was notably enhanced when the data were aggregated into two combination patterns (Table S3b). Using this approach, we attained accuracy levels of 97–98% and 98–99.5% for cases 1 and 2, respectively. Therefore, the ALS-based species classification method demonstrated the desired level of accuracy within the context of this study.

Reference

R Core Team (2024). R: A Language and Environment for Statistical Computing. R Foundation for Statistical Computing, Vienna, Austria. <https://www.R-project.org/>.

Table S4. Proportion of hardwood–cells in each group classified by the number of hardwood cells in neighboring ALS data. Only cells with a conifer–cells or hardwood–cells consistent between the forest registry and ALS data were included. All neighboring ALS data were used for classification. Values in parentheses are the numbers of cells.

|  |  | No. of horizontally or vertically adjacent hardwood cells | | | | |
| --- | --- | --- | --- | --- | --- | --- |
|  |  | 0 | 1 | 2 | 3 | 4 |
| No. of diagonally adjacent hardwood cells | 0 | 0.006  (2,226,154) | 0.154  (125,205) | 0.458  (23,318) | 0.736  (2665) | 0.790  (181) |
| 1 | 0.033  (285,329) | 0.139  (256,756) | 0.414  (135,102) | 0.797  (28,763) | 0.884  (3078) |
| 2 | 0.087  (32,901) | 0.155  (164,548) | 0.502  (216,268) | 0.865  (151,084) | 0.934  (28,063) |
| 3 | 0.154  (2513) | 0.245  (19,866) | 0.608  (100,010) | 0.881  (168,376) | 0.973  (168,115) |
| 4 | 0.202  (119) | 0.307  (1409) | 0.548  (11,299) | 0.849  (57,330) | 0.993  (773,378) |

Table S5. Key periods and events in postwar afforestation in Japan

| Plantation year | Period characteristics | Major forestry events | Stand age (years) | Forest age class | Proportion of stands in target area (%) |
| --- | --- | --- | --- | --- | --- |
|  |  |  | (in 2018) | |  |
| 1949–1953 | Afforestation on unforested land | Establishment of nursery fields (ca. 1950) | 66–70 | 14 | 4.9% |
| 1954–1958 | Start of afforestation and expanded efforts | Completion of afforestation on unforested land (1956) | 61–65 | 13 | 16.8% |
| 1959–1963 | Peak of afforestation efforts | Peak in seedling shipments (1960) | 56–60 | 12 | 21.0% |
| 1964–1968 | Later phase of expanded afforestation | Complete liberalization of timber imports (1964) | 51–55 | 11 | 17.7% |
| 1969–1973 | End of afforestation expansion | Sharp decline in afforestation area (1971) | 46–50 | 10 | 13.6% |
| 1974–1978 | Post-expansion afforestation period | Peak lumber prices (1975); afforestation area halved from peak (1978) | 41–45 | 9 | 6.9% |

Table S6. Combination of topographic variables achieving minimum AIC across subsets in Logistic GAM models by elevation zone. The numbers represent the number of subsets with minimum AIC.

|  | Elevation zone | | |
| --- | --- | --- | --- |
| Combination of topographic variables | Low  < 600 m | Middle  600–900 m | High  > 900 m |
| *Elevation* + *slope* + *aspect* + *TWI* | 351 | 339 | 236 |
| *Elevation* + *slope* + *aspect* | 15 | 22 | 31 |
| *Elevation* + *slope* + *TWI* | 7 | 12 | 21 |
| *Elevation* + *aspect* + *TWI* | 25 | 19 | 45 |
| *Slope* + *aspect* + *TWI* | 0 | 1 | 8 |
| *Elevation* + *slope* | 0 | 0 | 6 |
| *Elevation* + *aspect* | 2 | 3 | 17 |
| *Elevation* + *TWI* | 0 | 4 | 10 |
| *Slope* + *aspect* | 0 | 0 | 2 |
| *Slope* + *TWI* | 0 | 0 | 2 |
| *Aspect* + *TWI* | 0 | 0 | 6 |
| *Elevation* | 0 | 0 | 3 |
| *Slope* | 0 | 0 | 3 |
| *Aspect* | 0 | 0 | 3 |
| *TWI* | 0 | 0 | 6 |
| Total | 400 | 400 | 399 |
| Average ± SD of number of data grids (range) | 2759 ± 478 (1573–4029) | 1503 ± 529  (226–2831) | 544 ± 301  (50–1693)1) |
| 1) Subsets with fewer than 50 data were excluded from analysis.  SD, standard deviation. | | | |

Figure S1. (a) Semivariogram and (b) frequency distribution of the range.

The semivariogram in Figure S1a was calculated using all ALS data, regardless of their spatial correspondence with the forest register data. The ALS data were subjected to binary classification into hardwoods and others. We randomly selected 100 areas of 2 km2 from the ALS data and calculated average semivariances and the range (the distance at which the semivariogram was stable). Average semivariograms against the distance between two points were plotted for the subset of 100 areas in Figure S1a, and the frequency distribution of the ranges is plotted in Figure S1b. Semivariogram stability was defined to occur at 90% of the final semivariogram value. These analyses were conducted using Python v3.10.15, and spatial data processing was performed using GeoPandas, with numerical computations handled by NumPy, and visualization by the Matplotlib Pyplot module.

Figure S2. Frequency of elevation within (a) conifer–cells and (b) hardwood–cells. Line indicates the proportion of hardwood–cells. White circles indicate points with limited data (< 10,000 observations). The principal hardwood species were present at each elevation zone, as shown in (b, upper). Elevation frequency distributions were similar between conifer–cells and hardwood–cells, but the proportion of hardwood–cells tended to be greater at the lowest and highest elevations. This variation in the relationship between elevation and change patterns appeared to correspond to patterns in the predominant hardwood species (i.e., evergreen or deciduous). However, elevation ranges with a particularly high proportion of either category had limited numbers of data points.

Figure S3. Frequency distributions of geomorphic characteristics (left axis) and the proportion of hardwood–cells (right axis) across elevation zones. Gray and black bars represent conifer–cells and hardwood–cells, respectively. Data include (a) aspect; (b) slope; and (c) TWI, with left, center, and right panels corresponding to low-, middle-, and high-elevation zones, respectively. TWI was calculated by adding 1 to the raw values and applying a logarithmic transformation. The maximum slope class includes all grids with slopes steeper than 60°, and the minimum and maximum TWI classes represent values < 1.3 and > 2.4, respectively. White circles indicate points with limited data (< 10,000 observations). The proportion of hardwood–cells was higher at lower elevations on south-facing slopes and at higher elevations on north-facing slopes. However, data for the high-elevation zone were very limited. Further analysis with a larger dataset is needed to clarify the relationship between aspect and hardwood regeneration in the high-elevation zone. Slopes steeper than 40° were associated with a higher hardwood–cells probability, regardless of elevation zone. Moderate TWI values were associated with lower hardwood–cells probability.

Figure S4. Frequency distribution of geomorphic characteristics (left axis) and proportion of hardwood–cells (right axis) across elevation zones and geological categories. Data include (a) aspect; (b) slope; and (c) TWI. Legend and notes as in Figure S3. In the lower elevation zone, the response of hardwood–cells proportions to aspect varied among geologic categories. The Shimanto Belt and the Cretaceous system in the Chichibu Terrane exhibited higher proportions on south-facing slopes, whereas other geologic categories showed little variation in proportions across different aspects. Although the overall patterns of the relationships between slope and hardwood–cells proportions, as well as between TWI and hardwood–cells proportions, varied little across geologic categories, the proportion values themselves appeared to differ among categories. For example, these percentages were lower in the Sambagawa Belt than in the Cretaceous System of the Chichibu Terrane (b and c, left panels). A limited number of geological categories in the high- and middle-elevation zones provided a significant quantity of data (> 10,000 for each class). The proportions of hardwood–cells by geological zone, stratified by elevation zone, are presented in Table S1.

Short Abstract for GTOC

A spatial analysis based on publicly available high-resolution LiDAR data revealed geographic biases in hardwood regeneration in conifer plantations. Hardwood regeneration was most prevalent on south-facing slopes at lower elevations, which was more evident within specific geologic zones.
